# Supplementary material for: Construction and validation of a metabolic gene-associated prognostic model for cervical carcinoma and the role on tumor microenvironment and immunity
Source: publisher site journal article supplement (doi:10.18632/aging.203723), 2021-12-01
Supplement: Supplementary file [file aging-v13i23-203723-supplementary-material-SD2.pdf]

## SUPPLEMENTARY TABLES

**Supplementary Table 1. Univariate and multivariate cox regression analysis to identify prognosis-related metabolic genes.**

| ID      | Univariate Cox regression analysis |         | Multivariate Cox regression analysis |                         |         |
|---------|------------------------------------|---------|--------------------------------------|-------------------------|---------|
|         | HR (95%CI)                         | P-value | coef                                 | HR (95%CI)              | P-value |
| AGPAT4  | 1.2452 (1.0732, 1.4448)            | 0.0038  | 0.2777                               | 1.3201 (1.0961, 1.5899) | 0.0034  |
| ALOX12B | 0.8876 (0.7987, 0.9864)            | 0.0269  | -0.0964                              | 0.9081 (0.8144, 1.0126) | 0.0828  |
| GNG8    | 0.5753 (0.3771, 0.8778)            | 0.0103  | -0.5325                              | 0.5871 (0.3823, 0.9017) | 0.0150  |
| HCCS    | 0.9420 (0.8981, 0.9882)            | 0.0144  | -0.1019                              | 0.9031 (0.8516, 0.9577) | 0.0007  |
| LDHC    | 0.5612 (0.3923, 0.8028)            | 0.0016  | -0.5540                              | 0.5746 (0.4091, 0.8071) | 0.0014  |
| LIPG    | 1.2120 (1.1059, 1.3282)            | 0.0000  | 0.1157                               | 1.1227 (1.0139, 1.2431) | 0.0260  |
| MSMO1   | 1.0256 (1.0127, 1.0386)            | 0.0001  | 0.0205                               | 1.0207 (1.0063, 1.0353) | 0.0047  |
| NPR2    | 1.1327 (1.0222, 1.2552)            | 0.0174  | 0.1074                               | 1.1134 (0.9877, 1.2551) | 0.0788  |
| PGK1    | 1.0048 (1.0023, 1.0072)            | 0.0001  | 0.0032                               | 1.0032 (1.0004, 1.0060) | 0.0258  |
| PLA2G7  | 0.8987 (0.8259, 0.9778)            | 0.0131  | -0.1140                              | 0.8923 (0.8088, 0.9844) | 0.0229  |
| PTGDS   | 0.9824 (0.9670, 0.9981)            | 0.0286  | -0.0118                              | 0.9883 (0.9717, 1.0051) | 0.1705  |
| SULT1A3 | 0.0002 (0.0000, 0.2583)            | 0.0195  | -6.7515                              | 0.0012 (0.0000, 1.0095) | 0.0503  |
| SULT1E1 | 0.8769 (0.7756, 0.9915)            | 0.0360  | -0.1188                              | 0.8880 (0.7811, 1.0096) | 0.0697  |
| TUBB4B  | 0.9970 (0.9945, 0.9995)            | 0.0190  | -0.0039                              | 0.9961 (0.9930, 0.9993) | 0.0182  |
| TYMS    | 0.9796 (0.9622, 0.9973)            | 0.0242  | -0.0134                              | 0.9867 (0.9682, 1.0055) | 0.1635  |

Abbreviations: HR: hazard ratio; CI: confidence interval.

**Supplementary Table 2. Clinicopathological characteristics statistics of CC patients.**

| Characteristics | No. of patients (%) | Risk group (No. of patients) |                |
|-----------------|---------------------|------------------------------|----------------|
|                 |                     | Low (N = 147)                | High (N = 146) |
| Age (years)     | ≤65                 | 134 (91.2%)                  | 126 (86.3%)    |
|                 | >65                 | 13 (8.8%)                    | 20 (13.7%)     |
| Stage           | I                   | 84 (57.1%)                   | 75 (51.4%)     |
|                 | II                  | 36 (24.5%)                   | 28 (19.2%)     |
|                 | III                 | 19 (12.9%)                   | 23 (15.8%)     |
|                 | IV                  | 6 (4.1%)                     | 16 (11.0%)     |
|                 | Unknown             | 2 (1.4%)                     | 4 (2.7%)       |
| T stage         | T1                  | 80 (54.4%)                   | 57 (39.0%)     |

|                        |         |                 |                 |               |
|------------------------|---------|-----------------|-----------------|---------------|
|                        | T2      | 68 (23.2%)      | 40 (27.2%)      | 28 (19.2%)    |
|                        | T3      | 17 (5.8%)       | 5 (3.4%)        | 12 (8.2%)     |
|                        | T4      | 10 (3.4%)       | 2 (1.4%)        | 8 (5.5%)      |
|                        | Unknown | 61 (6.1%)       | 20 (13.6%)      | 41 (28.1%)    |
| <b>M stage</b>         | M0      | 107 (36.5%)     | 66 (44.9%)      | 41 (28.1%)    |
|                        | M1      | 11 (3.8%)       | 5 (3.4%)        | 6 (4.1%)      |
|                        | Unknown | 175 (59.7%)     | 66 (44.9%)      | 99 (67.8%)    |
| <b>N stage</b>         | N0      | 129 (44.0%)     | 78 (53.1%)      | 51 (34.9%)    |
|                        | N1      | 56 (19.1%)      | 30 (20.4%)      | 26 (17.8%)    |
|                        | Unknown | 108 (36.9%)     | 39 (26.5%)      | 69 (47.3%)    |
| <b>Survival status</b> | Alive   | 220 (75.1%)     | 135 (91.8%)     | 85 (58.2%)    |
|                        | Dead    | 73 (24.9%)      | 12 (8.2%)       | 61 (41.8%)    |
| <b>Survival time</b>   |         | 1072.9 ± 1145.6 | 1247.4 ± 1282.4 | 897.3 ± 957.4 |

**Supplementary Table 3. Univariate and multivariate cox regression analysis of clinical parameters.**

| <b>ID</b>                      | <b>Univariate Cox regression analysis</b> |                | <b>Multivariate Cox regression analysis</b> |                |
|--------------------------------|-------------------------------------------|----------------|---------------------------------------------|----------------|
|                                | <b>HR (95%CI)</b>                         | <b>P-value</b> | <b>HR (95%CI)</b>                           | <b>P-value</b> |
| TCGA dataset ( <i>N</i> = 293) |                                           |                |                                             |                |
| Age                            | 1.8986 (1.0407, 3.4639)                   | 0.03661443     | 1.4242 (0.7599, 2.6692)                     | 0.26988095     |
| Stage                          | 1.3209 (1.0834, 1.6109)                   | 0.005903701    | 1.2284 (0.9726, 1.5514)                     | 0.084245145    |
| T                              | 1.2524 (1.0968, 1.4300)                   | 0.00088526     | 1.0215 (0.8279, 1.2605)                     | 0.842492879    |
| M                              | 1.3454 (1.0393, 1.7417)                   | 0.024323173    | 1.1211 (0.7997, 1.5717)                     | 0.507094822    |
| N                              | 1.6765 (1.2814, 2.1934)                   | 0.000164465    | 1.3432 (0.8721, 2.0688)                     | 0.180549318    |
| riskScore                      | 1.0704 (1.0539, 1.0871)                   | 7.85E-18       | 1.0785 (1.0584, 1.0990)                     | 3.62E-15       |
